# Supplementary material
Source: PubMed Central journal article supplement (PMC7462026)
Supplement: Supp_Fig1.pdf [file Supp_Fig1.pdf]

## Supplementary Data

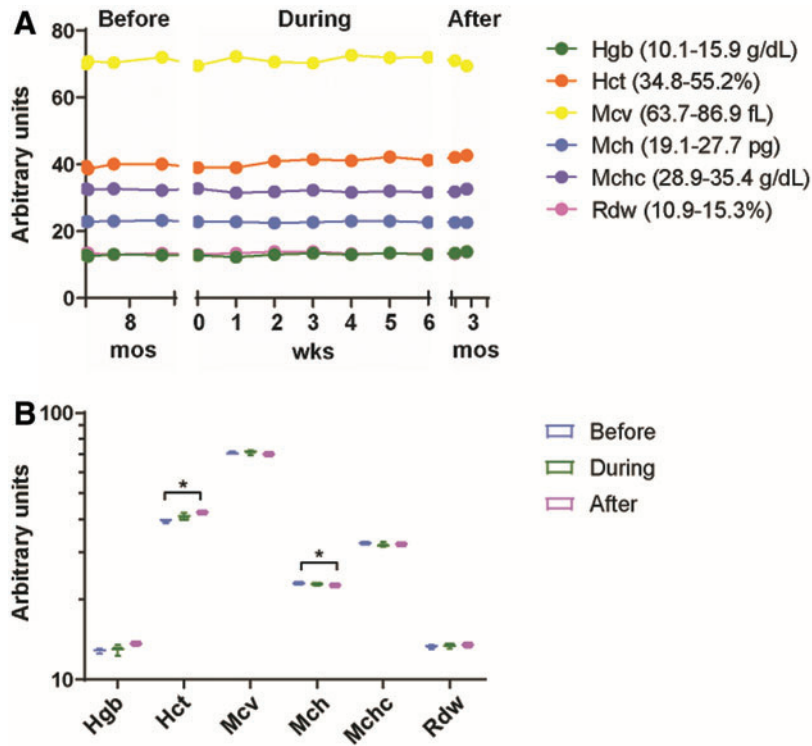

**SUPPLEMENTARY FIG. S1.** Erythrocyte properties from NHP peripheral blood. **(A)** Graph of erythrocyte properties from before, during, and after the engraftment experiment. Normal ranges are shown in figure legend. **(B)** Graph of averaged erythrocyte property values from periods of study. One-way ANOVA with Tukey's post hoc test was performed.  $*p < 0.05$ . ANOVA, analysis of variance; Hct, hematocrit; Hgb, hemoglobin; Mch, mean corpuscular hemoglobin; Mchc, mean corpuscular hemoglobin per cell; Mcv, mean corpuscular volume; NHP, nonhuman primate; Rdw, red blood cell distribution width.
