# Supplementary material
Source: PubMed Central journal article supplement (PMC7462026)
Supplement: Supp_Fig2.pdf [file Supp_Fig2.pdf]

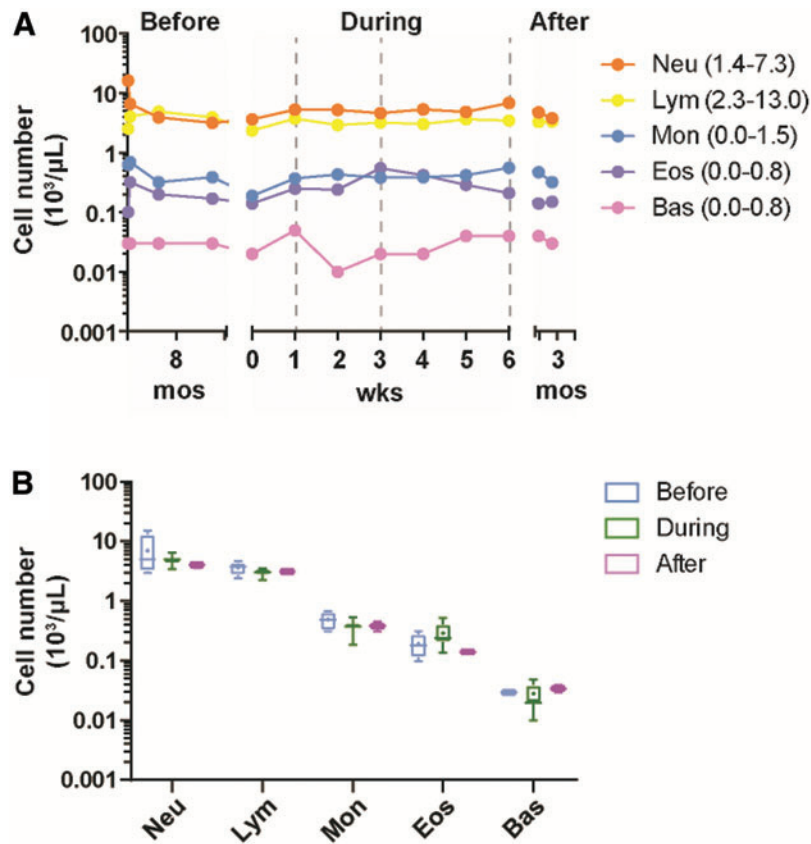

**SUPPLEMENTARY FIG. S2.** Leukocyte profile from NHP peripheral blood. **(A)** Graph of white blood cells from before, during, and after the engraftment experiment. Normal ranges are shown in figure legend. **(B)** Graph of averaged leukocyte cell counts from periods of study. One-way ANOVA with Tukey's post hoc test was performed. Bas, basophils; Eos, eosinophils; Neu, neutrophils; Lym, lymphocytes; Mon, monocytes.
